# Supplementary material for: Efficacy and Safety of Adrenergic Alpha-1 Receptor Antagonists in Older Adults: A Systematic Review and Meta-analysis for the Development of Recommendations to Reduce Potentially Inappropriate Prescribing
Source: Research Square preprint supplement (doi:10.21203/rs.3.rs-1132435/v1), 2022-01-10
Supplement: Supplementary file 1 [file 02bf1cbf43225b7b68ad9726.docx]

**Additional file 3** Additional information on patient characteristics for each study used in the included meta-analyses

| **Meta-analysis** | **Included studies** | **Race/ethnicity in %** | **Men in %** | **BPH related scores (mean values)** | **Co-medication** | **Co-morbidities** |
| --- | --- | --- | --- | --- | --- | --- |
| Buzelin et al. (1997) [54] | Buzelin (1997) [68]  Double-blind randomized placebo-controlled trial | N.a. | 100% | SR Alfuzosin:   - IPSS: 15.0 - Boyarsky score: 9.9 - Qmax: 10.4 ml/s - PVR: 58 ml   Placebo:   - IPSS: 15.9 - Boyarsky score: 10.3 - Qmax: 10.1 ml/s - PVR: 63 ml | Patients were excluded if they used a drug that could interfere with the voiding pattern. | SR Alfuzosin:   - CVD: 45% - Hypertension: 29%   Placebo:   - CVD: 49% - Hypertension: 29% |
| Second included study not published and data therefore not available. | | | | | |
| Lowe (1994) [56] | Lepor (1992) [69]  Double-blind randomized placebo-controlled trial | - N.a. | 100% | Placebo/2mg/5mg/10mg:   - Boyarsky score: 9.7/10.0/10.7/10.1 - Qmax in ml/s:   10.1/8.8/9.3/8.8 | Patients were excluded if they used a drug that could interfere with study (e.g. α-agonists, (anti)cholinergic drug, diuretics, antihypertensive medication) | Patients were excluded if they had (a history of) one or more of the following diseases:   - Postural hypotension - TIA - Myocardial infarction - CeVD - Carcinoma of prostate - Surgery for BPH - Urinary tract disease - Insulin dependent diabetes - Renal insufficiency - Hepatic impairment |
| Lloyd (1992) [70]  Double-blind randomized placebo-controlled trial | N.a. | 100% | Placebo/2mg/5mg/10mg:   - Boyarsky obstructive Symptom Score:   6.8/6.5/6.3/6.6   - Boyarsky irritative Symptom Score:   4.4/4.0/4.1/5.2   - Qmax in ml/s:   7.8/7.9/8.0/8.4 | Patients were excluded if they used a drug that could interfere with study (e.g. antihypertensive medication incl. diuretics and vasodilators) | Patients were excluded if they had (a history of) one or more of the following diseases:   - Postural hypotension - Syncope - TIA - Myocardial infarction - CeVD - Carcinoma of prostate - Surgery for BPH - Urinary tract disease - Hydronephrosis - Insulin dependent diabetes - Renal insufficiency - Hepatic impairment |
| Di Silverio (1992) [71]  Double-blind randomized placebo-controlled trial | N.a. | 100% | Placebo/2mg/5mg/10mg:   - Boyarsky obstructive Symptom Score:   6.0/5.1/6.0/6.0   - PVR in ml:   48.8/45.6/47.2/60.4   - Qmax in ml/s:   8.8/8.8/8.3/8.4 | Patients were excluded if they were treated for hypertension | N.a. |
| Brawer (1993) [72]  Double-blind randomized placebo-controlled trial | N.a. | 100% | Placebo vs. terazosin:   - Boyarsky symptom score:   10.4 vs. 10.9   - Qmax in ml/s:   8.8 vs. 8.6 | N.a. | Patients were excluded if they had (a history of) one or more of the following diseases:   - Carcinoma of prostate - Detrusor instability - Significant cardiopulmonary disease |
| 2 included studies not published and data therefore not available. | | | | | |
