# Supplementary material for: Efficacy and Safety of Adrenergic Alpha-1 Receptor Antagonists in Older Adults: A Systematic Review and Meta-analysis for the Development of Recommendations to Reduce Potentially Inappropriate Prescribing
Source: Research Square preprint supplement (doi:10.21203/rs.3.rs-1132435/v1), 2022-01-10
Supplement: Supplementary file 1 [file bf1e44ef7fafb2deac3650f7.docx]

**Additional file 4** Summary of patient characteristics of included studies

**Table d** Summary of patient characteristics of included interventional studies

| **Authors (Year)** | **Recruitment** | **Sample size and age profile** | **Race/ethnicity in %** | **Men in %** | **BPH related scores (mean values)** | **Co-medication** | **Co-morbidities** |
| --- | --- | --- | --- | --- | --- | --- | --- |
| ALLHAT (2003) [43]1 | Practice based setting in the US only through (e.g.):   - Universities or medical centers - Veterans Hospitals - Practices - Primary care - Specialty clinics | Doxazosin:   - n=9,061 - ≥70 y: 3,092   Chlorthalidone:   - n=15,255 - ≥70 y: 5,410 | Chlorthalidone:   - White: 47.2% - Black: 31.9% - Hispanic: 15.8% - Other: 5.1%   Doxazosin:   - White: 46.5% - Black: 32.9% - Hispanic: 16% - Other: 4.6% | Chlorthalidone: 53.0%  Doxazosin: 53.6% | N.a. | Additional treatment for hypertension was allowed with:   - Atenolol - Reserpine - Clonidine - Hydralazine | Comorbidities such as atherosclerotic cardiovascular disease, type 2 diabetes and unfavourable cholesterol levels were matched between the chlorthalidone and doxazosin group |
| Gotoh et al. (2005) [44]2 | Multicenter trial in JP through 17 urologists in 16 sites | Tamsulosin:   - n=75 - mean age: 68.5 y - 95% CI: 67.0 – 70.1 y   Naftopidil:   - n=69 - mean age: 68.0 y - 95% CI: 66.4 – 69.8 y | N.a. | 100% | Tamsulosin:   - Vprostate: 33.6 ml - IPSS: 17.1 - QoL: 4.4 - PVR: 42.5 ml   Naftopidil:   - Vprostate: 29 ml - IPSS: 15.5 - QoL: 4.5 - PVR: 46.6 ml | Patients were excluded if they were currently in treatment with:   - Antiandrogens - α1-antagonists - Anticholinergic drugs | Patients were excluded if they had (a history of) one or more of the following diseases:   - Orthostatic hypertension - Neurological disease incl. bladder dysfunction - Carcinoma of bladder or prostate - Surgery for BPH or bladder neck obstruction - Urinary tract infections |
| Nishino et al. (2006) [45]3 | Patients of the Department of Urology at Gifu University (JP) | Tamsulosin/ naftopidil:   - n=17   Naftopidil/ tamsulosin:   - n=17 | N.a. | 100% | - Vprostate: 19.8 ml - IPSS: 20.4 - QoL: 4.9 - PVR: 54.1 ml - Qmax: 9.9 ml/s | Patients were excluded if they had ever been medically treated for BPH | Patients were excluded if they had (a history of) one or more of the following diseases (e.g.):   - Neurogenic disorders - Urinary retention - Carcinoma of bladder - Urinary tract infections |
| Oelke et al. (2014) [46]4 | Patients were recruited internationally in 44 urology sites in Europe (71%), Mexico and Australia | Tamsulosin:   - n=168 - ≥66 y: 72   Tadalafil:   - n=171 - ≥66 y: 75   Placebo:   - n=172 - ≥66 y: 77 | Tamsulosin:   - White: 78% - Black/African American: 0% - American Indian/Alaska Native: 22%   Tadalafil:   - White: 76% - Black/African American: 0.6% - American Indian/Alaska Native: 23.4%   Placebo:   - White: 76.2% - Black/African American: 0% - American Indian/Alaska Native: 23.8% | 100% | Tamsulosin:   - IPSS: 16.8 - Erectile dysfunction (ED): 69% - BMI: 27.9 kg/m²   Tadalafil:   - IPSS: 17.2 - ED: 70.8% - BMI: 27.1 kg/m²   Placebo:   - IPSS: 17.4 - ED: 69.8% - BMI: 28.1 kg/m² | Previous therapies within 12 mo prior to screening:  Tamsulosin:   - α-blockers: 25.6% - Other LUTS/BPH therapy: 5.4% - ED therapy: 12.5%   Tadalafil:   - α-blockers: 24% - Other LUTS/BPH therapy: 3.5% - ED therapy: 12.3%   Placebo:   - α-blockers: 26.2% - Other LUTS/BPH therapy: 4.7% - ED therapy: 13.4% | Patients excluded if they had (had) prostate cancer |
| Roehrborn (2006) [47]5 | Patients were recruited internationally in 148 urology sites in North America, Europe, Australia, Middle East and South-Africa | Alfuzosin:   - n=759 - ≥65 y: 449   Placebo:   - n=763 - ≥65 y: 439 | N.a. | 100% | Alfuzosin:   - Vprostate: 46.9 ml - IPSS: 19.2 - PVR: 95.3 ml - Qmax: 8.9 ml/s   Placebo:   - Vprostate: 46.6 ml - IPSS: 19.2 - PVR: 89 ml - Qmax: 8.8 ml/s | Patients were excluded if they were taking medication which would eventually change the voiding pattern | Hypertension:   - Alfuzosin: 36.1% - Placebo: 35%   Patients were excluded if they had (a history of) one or more of the following diseases:   - Postural hypotension or syncope - Carcinoma of prostate - Surgery of prostate - AUR |
| Yokoyama et al. (2011) [48]6 | Department of Urology at Kawasaki Medical School, Japan | Tamsulosin:   - n=45 - mean age: 71.5 y   Silodosin:   - n=45 - mean age: 70.2 y   Naftopidil:   - n=46 - mean age: 69.1 y | N.a. | 100% | Tamsulosin:   - Vprostate: 32.5 ml - IPSS: 18 - QoL: 4.49 - PVR: 29.7 ml - Qmax: 8.56 ml/s   Silodosin:   - Vprostate: 33.3 ml - IPSS: 18.7 - QoL: 4.5 - PVR: 57.6 ml - Qmax: 9.03 ml/s   Naftopidil:   - Vprostate: 35 ml - IPSS: 17.4 - QoL: 4.55 - PVR: 39.1 ml - Qmax: 8.63 ml/s | N.a. | N.a. |

1 Patient characteristics refer to total study population including patients of all age groups ≥55 y.

2 Patient characteristics refer to total study population including patients of all age groups ≥50 y with mean age (95% CI) being 68.5 y (67.0 y – 70.1 y)

3 All patients are aged ≥66 y.

4 Patient characteristics refer to total study population including patients of all age groups ≥45 y.

5 Patient characteristics refer to total study population including patients of all age groups ≥55 y.

6 Patient characteristics refer to total study population including patients of all age groups ≥50 y with mean age (SD) being 70.2 y (0.9), 71.5 y (1.1) and 69 y (1.2) for the silodosin, tamsulosin or nifedipine group, respectively.

**Table e** Summary of patient characteristics of included observational studies

| Authors (Year) | Recruitment | Sample size and age profile | Race/ethnicity in % | Men in % | Co-medication (numbers represent mean values) | Co-morbidities |
| --- | --- | --- | --- | --- | --- | --- |
| Retrospective Cohort Studies: | | | | | | |
| Chrischilles et al. (2001) [49]1 | Cohorts were created from information received through a medical claims database in the US (1995-1997) including:   - Outpatient drug utilization - Inpatient physician services - Outpatient physician services | Users:   - n=1,564 - Mean age: 73 y - Prazosin=15 - Doxazosin=782 - Terazosin=839   Non-Users:   - n=8,641 - Mean age: 72.5 y | N.a. | 100% | Use of additional antihypertensive drugs (α1-blocker users vs. non-users):   - Any agent: 56.3 % vs. 26.2% - ACE-inhibitors: 28.9% vs. 12.2% - Beta-blockers: 15.4% vs. 6.6% - Ca-Channel-blockers: 35.6% vs. 14.7% - Diuretics: 33.7% vs. 13.4%   No. of agents used:   - 0: 34.1% vs. 71.4% - 1: 30.2% vs. 14.3% - 2: 21.4% vs. 9.8% - >3: 14.2% vs. 4.6% | α1-blocker users vs. non-users:   - Hypertension: 23% vs. 20.4% - Type 2 Diabetes: 8.2% vs. 7.1% - Cardiac arrhythmia: 8.3% vs. 7.2%   No. of comorbidities:   - 0: 62.7% vs. 66.3% - 1: 28.8% vs. 27.6% - 2: 7.4% vs. 5.0% - >3: 1.2% vs. 1.1% |
| Duan et al. (2018) [50]2 | Cohorts were created from US Medicare data (2006-2012) including 100% US Medicare beneficiaries | Tamsulosin:   - n=253,136   No BPH-medication:   - n=180,926   Doxazosin:   - n=28,581   Terazosin:   - n=23,858   Alfuzosin:   - n=17,934   Dutasteride:   - n=34,027   Finasteride:   - n=38,767 | Tamsulosin:   - White: 86.7% - Black: 5.7% - Hispanic: 2.6% - Other: 5.1%   No BPH medication:   - White: 86.8% - Black: 5.6% - Hispanic: 2.5% - Other: 5.1% | 100% | No. of drugs used (tamsulosin vs. no BPH medication):   - 1-2: 29.2% vs. 29.2% - 3-4: 31.3% vs. 31.3.% - 5-6: 18.2% vs. 18.4% - ≥7: 8.7% vs. 8.6% | Tamsulosin vs. no BPH medication:   - CeVD: 7.7% vs. 7.7% - PVD: 10.9% vs. 10.9% - CHF: 10.3% vs. 10.1% - Hypertension: 64.4% vs. 64.3% - Diabetes: 26.7% vs. 26.7% - Hyperlipidemia: 56.9% vs. 56.7% - Depression: 4.9% vs. 4.8% |
| Welk et al. (2015) [51]3 | Cohorts were derived from administrative data provided by the province of Ontario, Canada | Alpha-blocker initiation:   - n=147,084   No initiation:   - n=147,084 | n.a. | 100% | Matched cohorts: unexposed (no α1-blocker use) vs. exposed (α1-blocker use):   - Cancer: 22% vs. 20.5% - Cataract: 19.3% vs. 19% - CKD: 9.8% vs. 9.1% - Chronic lung disease: 28.1% vs. 28.1% - CHF: 14.1% vs. 13.3% - Coronary artery disease or angina: 42.9% vs. 42.4% - Dementia: 9.9% vs. 10.5% - Diabetes: 20.6% vs. 20.9% - Glaucoma: 6.8% vs. 6.5% - Hypertension: 69.8% vs. 69.4% - Osteoporosis: 6.1% vs. 6.0% - Prostate cancer: 13.0% vs. 11.7% | Matched cohorts: unexposed (no α1-blocker use) vs. exposed (α1-blocker use):   - 5α-reductase inhibitors: 7.4% vs. 7.4% - ACE-inhibitors: 49.5% vs. 49.3% - Anti-inflammatory drugs: 15.8% vs. 16.8% - Antibiotics: 37.3% vs. 38.3% - Anticonvulsants: 5.0% vs. 5.1% - Antidepressants: 7.2% vs. 7.4% - Antineoplastic: 5.5% vs. 5.0% - Antiplatelets: 7.3% vs. 7.2% - Benzodiazepines: 14.2% vs. 14.4% - Beta-blockers: 32.3% vs. 30.9% - Bisphosphonates: 6.8% vs. 6.5% - Ca-channel blockers: 26.9% vs. 27.3% - Glucocorticoids: 9.6% vs. 9.5% - Inhaled acetylcholine: 7.5% vs. 7.6% - Inhaled beta-agonist: 13.3% vs. 12.8% - Inhaled corticosteroids: 6.0% vs. 5.5% - Narcotics: 19.2% vs. 19.4% - Non-potassium sparing diuretics: 26.4% vs. 23.8% - Potassium sparing diuretics: 4.2% vs. 3.6% - PPI: 25.9% vs. 25.4% - SSRI: 7.0% vs. 7.0% - Statins: 48.8% vs. 48.6% |
| **Case-Control Studies:** | | | | | | |
| Hall and McMahon (2007) [52]4 | Cases and Controls were derived from data from the UK primary care records (THIN database) | Cases (fracture):   - n=6,540 - Taking MR Doxazosin: 66 - Taking MR Doxazosin and ≥75y: 32   Controls (no fracture):   - n=26,495 - Taking MR Doxazosin: 311 - Taking MR Doxazosin and ≥75y: 173 | N.a. | 100% | Cases (fractures) vs. controls (no fractures):   - Thiazide diuretics: 14.5% vs. 17.1% - Other anti-hypertensives: 31.4% vs. 33.5% - Other cardiac drugs: 22.1% vs. 19.9% - Benzodiazepines: 9.8% vs. 7.3% - Antipsychotics: 6.2% vs. 3.6% - NSAIDs: 28.8% vs. 25.3% - Antidepressants: 16.1% vs. 10.3% - Oestrogen: 3.8% vs. 5.9% - Other osteoporosis treatment: 12.3% vs. 7.7% - Glucocorticoids: 8.4% vs. 6.0% | Cases (fractures) vs. controls (no fractures):   - Arthritis (excl. rheumatoid arthritis): 27.6% vs. 26.8% - Heart failure: 6.9% vs. 5.5% - COPD: 20.2% vs. 27.6% - Cerebrovascular accident: 10.9% vs. 8.6% - Osteoporosis: 8.0% vs. 4.8% - Type II diabetes: 8.9% vs. 7.9% - Dementia: 5.4% vs. 2.2% |
| Testa et al. (2018) [53]5 | Cases and Controls were enrolled in different settings in Italy including outpatient departments, nursing homes and acute care units | Syncopal fall:   - n=354 - Mean age: 83.3 y   Non-syncopal fall:   - n=168 - Mean age: 83.9 y | N.a. | 37.9% | Cases (syncopal fall) vs. controls (non-syncopal fall):   - No. of antihypertensives: 2.9 vs. 2.5 - < 2 antihypertensives: 50% vs. 56.4% | Cases (syncopal fall) vs. controls (non-syncopal fall):   - Alzheimer’s: 31.9% vs. 35.1% - Vascular dementia: 42.9% vs. 38.7% - Mixed dementia: 15.5% vs. 15.5% - Parkinson’s: 5.6% vs. 6.5% - Hypertension: 74.3% vs. 75% - CAD: 19.5% vs. 18.5% - CHF: 8.5% vs. 10.1% - Atrial fibrillation: 25.1% vs. 23.8% - Stroke: 11.6% vs. 19.6% - TIA: 7.6% vs. 7.1% - Carotid atherosclerosis: 27.4% vs. 20.2% - Psychiatric disease: 33.6% vs. 29.2% - Diabetes: 20.9% vs. 24.4% - Dysthyroidism: 10.9% vs. 10.9% |

1 All patients are aged ≥65 y.

2 Duan (2018) includes 6 cohort-pairs, all of which were prospensity-score-matched. The figures presented in this table only concern the biggest cohort with 161,729 people comparing tamsulosin-users vs. no BPH medication. All patients are aged ≥66 y.

3 All patients are aged ≥66 y.

4 Patient characteristics refer to total study population including patients of all age groups ≥50 y.

5 All patients are aged ≥65 y.

**Table f** Summary of patient characteristics of included meta-analyses

| Authors (Year) | Data used | Patients | Race/ethnicity in % | Men in % | BPH related scores (mean values) | Co-medication | Co-morbidities |
| --- | --- | --- | --- | --- | --- | --- | --- |
| Buzelin et al. (1997) [54]1 | Meta-analysis using raw data from two placebo-controlled studies conducted in 61 urological centers throughout Europe [56], 2nd study not published separately | SR alfzusosin:   - n=292 - ≥65 y: 149   Placebo:   - n=296 - ≥65 y: 153 | N.a. | 100% | Alfuzosin:   - Boyarsky score: 9.4 - Qmax: 9.3 ml/s   Placebo:   - Boyarsky score: 9.6 - Qmax: 9.2 ml/s | Alfuzosin:   - Antihypertensives: 30%   Placebo:   - Antihypertensives: 30% | Alfuzosin:   - CVD: 43% - Hypertension: 29%   Placebo:   - CVD: 43% - Hypertension: 29% |
| Lowe (1994) [56]2 | Meta-analysis using raw data from six placebo-controlled trials, three conducted in the US (two of which two are unpublished) and three conducted in Europe [57-60] | Terazosin:   - n=636 - ≥65 y: 285   Placebo:   - n=360 - ≥65 y: 162 | White: 94% | 100% | N.a. | N.a. | N.a. |
| Chapple et al. (1997) [55] | Retrospective analysis of data from a meta-analysis [61] using raw data from two European multinational, multicentre, double-blind, placebo-controlled, randomized trials [62], 2nd study not published separately | Tamsulosin:   - <65 y: 190 - ≥65 y: 191   Placebo:   - <65 y: 93 - ≥65 y: 100 | N.a. | 100% | N.a. | Tamsulosin:   - Antihypertensives/CV medication: 55/191 (29%)   Placebo:   - Antihypertensives/CV medication: 25/100 (25%) | Tamsulosin:   - CV disease: 69/191 (39%) - Hypertension: 46/186 (25%)   Placebo:   - CV disease: 23/100 (23%)   Hypertension: 22/97 (23%) |

1 Patient characteristics refer to total study population including patients of all age groups.

2 Patient characteristics refer to total study population including patients of all age groups.
