# Supplementary material for: Efficacy and Safety of Adrenergic Alpha-1 Receptor Antagonists in Older Adults: A Systematic Review and Meta-analysis for the Development of Recommendations to Reduce Potentially Inappropriate Prescribing
Source: Research Square preprint supplement (doi:10.21203/rs.3.rs-1132435/v1), 2022-01-10
Supplement: Supplementary file 3 [file a65525bfc88df8184eab498d.docx]

**Additional file 1** Search terms used in the literature database search

| P(1) | Patients |
| --- | --- |
| 1 | geriatrics.mp. or exp geriatrics/ |
| 2 | geriatric patient.mp. |
| 3 | geriatric*.mp. |
| 4 | (elder$ or geriatric$).ab,ti. |
| 5 | elder*.mp. |
| 6 | frail elderly.mp. or exp frail elderly/ |
| 7 | aged.mp. or exp Aged/ |
| 8 | old*.mp. |
| 9 | old* adult*.mp. |
| 10 | old* people*.mp. |
| 11 | >65.mp. |
| 12 | over 65.mp. |
| 13 | or/1-12 |
| P(2) | Condition |
| 14 | Benign prostatic hyperplasia.mp. |
| 15 | Lower urinary tract symptoms.mp. |
| 16 | Urination dysorders.mp. |
| 17 | Blood Pressure, high.mp. |
| 18 | Cardiac Failure.mp. |
| 19 | Raynaud’s Disease.mp. |
| 20 | or/14-19 |
| I | Drugs |
| 21 | Alpha Blockers.mp. |
| 22 | Tamsulosin.mp. |
| 23 | Doxazosin.mp. |
| 24 | Terazosin.mp. |
| 25 | Alfuzosin.mp. |
| 26 | Or/21-25 |
| O | Outcomes |
| 27 | Mortality.mp. |
| 28 | Life expectancy.mp. |
| 29 | Quality-adjusted Life Years.mp |
| 30 | Quality of Life.mp. |
| 31 | QOL.mp. |
| 32 | Hospitalization.mp. |
| 33 | Adverse effects.mp. |
| 34 | Toxicity, Drug.mp. |
| 35 | Allergic Reaction.mp. |
| 36 | Rash.mp. |
| 37 | Safety.mp. |
| 38 | Falls.mp. |
| 39 | Cognitive Function.mp. |
| 40 | Cognitive Decline.mp. |
| 41 | Delirium.mp. |
| 42 | Lightheadedness.mp OR Light-Headedness.mp |
| 43 | Vertigo.mp. |
| 44 | Somnolence.mp. |
| 45 | Lassitude.mp. |
| 46 | Asthenia.mp. |
| 47 | Lethargy.mp. |
| 48 | Head Pain.mp. |
| 49 | Nausea.mp. |
| 50 | Emesis.mp. |
| 51 | Appetite Loss.mp. |
| 52 | Constipation.mp. |
| 53 | Diarrhea.mp. |
| 54 | Cardiovascular.mp. |
| 55 | Cerebrovascular.mp. |
| 56 | Low Blood Pressure.mp. |
| 57 | Hypotension, postural.mp. |
| 58 | Tachycardia.mp. |
| 59 | Chest pain.mp. |
| 60 | Anasarca.mp. OR Oedema.mp. |
| 61 | Dry mouth.mp. |
| 62 | Rhinitis.mp. |
| 63 | Accommodation.mp. |
| 64 | Incontinence.mp. |
| 65 | Ejaculation.mp. |
| 66 | or/27-65 |
| S | Studies |
| 67 | Cohort studies.mp |
| 68 | Case-control studies.mp |
| 69 | Randomized controlled trial.mp |
| 70 | Non-randomized controlled trial.mp |
| 71 | Systematic review.mp |
| 72 | Meta-analysis.mp or network meta-analysis.mp |
| 73 | or/67-72 |
| 74 | 13 and 20 and 26 and 66 and 73 |
