# Supplementary material for: Efficacy and Safety of Adrenergic Alpha-1 Receptor Antagonists in Older Adults: A Systematic Review and Meta-analysis for the Development of Recommendations to Reduce Potentially Inappropriate Prescribing
Source: Research Square preprint supplement (doi:10.21203/rs.3.rs-1132435/v1), 2022-01-10
Supplement: Supplementary file 5 [file ebfb91c3d5b81dc25ebf167a.docx]

**Additional file 3** Summary of characteristics of included studies

**Table a** Summary of characteristics of included interventional studies

| **Authors (year), place** | **Study type** | **Intention of the study** | **Intervention** | **Inclusion criteria** | **Follow-up period** | **Measured outcome** | **Sponsors** |
| --- | --- | --- | --- | --- | --- | --- | --- |
| ALLHAT (2003) [43]  US, CA, PR | Rando-mized double-blind controlled trial | To compare the efficacy of doxazosin vs. chlorthalidone in reducing coronary events | Doxazosin 2, 4 or 8 mg/d vs. chlorthali-done 12.5 or 25 mg/d | - Age ≥55 y - RRsys ≥140 mmHg or RRdia ≥90 mmHg or antihyper-tensive medication - ≥1 additional risk factor for cardiac heart disease (CHD) | Mean: 3.2 years | *Primary outcome:*  combined incidence of fatal CHD or nonfatal myocardial infarction  *Secondary outcome:*  mortality, combined CHD, stroke, combined cardiovascular disease (CVD) | - National Heart, Lung, and Blood Institute (US) - Medications by Pfizer Inc, AstraZeneca, Bristol-Myers Squibb - Financial support by Pfizer Inc |
| Gotoh et al. (2005) [44]  JP | Rando-mized controlled trial | To compare the efficacy and safety of tamsulosin vs. naftopidil in the treatment of symptomatic BPH | Tamsulosin 0.2mg/d  vs. naftopidil 50mg/d | - Age ≥50 y - Symptomatic BPH - IPSS ≥8 - Qmax <15 ml/s - Voiding volume ≥150 ml - Vprostate: ≥20 ml | 12 weeks | *Primary outcomes:*  changes in IPSS, Qmax and residual urine volume  *Secondary outcomes:* average flow rate, changes in IPSS storage score and IPSS voiding score, quality-of-life score | N.a. |
| Nishino et al. (2006) [45]  JP | Rando-mized crossover trial | To compare the efficacy of tamsulosin vs. naftopidil in the treatment of LUTS suggestive of BPH | Tamsulosin 0.2 mg/d  vs. naftopidil  50 mg/d | - Age ≥66 y - Symptomatic BPH - IPSS ≥8 - Qmax: ≤15 ml/s - No prior treatment for BPH | 9 weeks (two 4-week trials for each substance and a 1-week washout in between) | IPSS, quality-of-life score, uroflowmetry, pressure flow study | Gifu University, JP |
| Oelke et al.  (2014) [46]  AU, AT, BE, FR, DE, GR, IT, MX, NL, PL | Rando-mized double-blind placebo-controlled trial | To evaluate the treatment satisfaction with tamsulosin, tadalafil or placebo in men with LUTS suggestive of BPH | Tamsulosin 0.4 mg/d  vs. tadalafil  5 mg/d  vs. placebo | - Age ≥ 45y - Symptomatic BPH > 6mo - IPSS ≥13 - Qmax: 4-15 ml/s - PVR < 300 ml - No treatment with finasteride within 3mo - No treatment with dutasteride within 6mo | 12 weeks | Treatment Satisfaction Scale-BPH (TSS-BPH) | - Eli Lilly and Company - Personal fees from diverse pharma-ceutical companies for authors - Three authors employed by Eli Lilly and Company during conduct of study |
| Roehrborn (2006) [47]  North America, Australia, Middle East, South Africa,  Europe | Rando-mized double-blind placebo-controlled trial | To assess the occurrence of progression events suggestive of LUTS/BPH within a two-year period of treatment with alfuzosin 10 mg | Alfuzosin 10 mg/d  vs. placebo | - Age ≥ 55y - Symptomatic BPH ≥ 6mo - IPSS ≥13 - Qmax: 5-12 ml/s - Voiding volume ≥150 ml - PVR ≥350 ml - Vprostate: ≥30 g | 24 months | *Primary outcome:*  Occurrence of first period of acute urinary retention  *Secondary outcomes:*  BPH-related surgery, total IPSS, bother score, Qmax | Sanofi-Aventis |
| Yokoyama et al. (2011) [48]  JP | Rando-mized controlled trial | To explore the effects of tamsulosin, silodosin and naftopidil on LUTS, erectile dysfunction and ejaculatory dysfunction in patients with BPH | Tamsulosin 0.2 mg/d  vs. silodosin  8 mg/d  vs. naftopidil 50 mg/d | - Age ≥50 - Symptomatic BPH - IPSS ≥8 | 12 weeks | IPSS, quality-of-life score, International Index of Erectile Function (IIEF-5), Qmax, PVR | N.a. |

**Table b** Summary of characteristics of included observational studies

| **Authors (year), place** | **Study type** | **Intention of the study** | **Intervention** | **Inclusion criteria** | **Follow-up period** | **Measured outcome** | **Sponsor** |
| --- | --- | --- | --- | --- | --- | --- | --- |
| Chrischilles et al. (2001) [49]  US | Retro-spective cohort study | To examine the effect of treatment initiation with terazosin, doxazosin or prazosin on hypotension related adverse events | Users (terazosin/ doxazosin/ prazosin)  vs. non-users | - Age ≥65 y - Diagnosed BPH | 4 months | Possibly hypotension related adverse effects (e.g. hypotension, syncope, dizziness, falls) | Grant from Boehr-inger Ingelheim |
| Duan et al. (2018) [50]  US | Retro-spective Cohort Study | To explore the association of tamsulosin use and risk of dementia among elderly patients | Tamsulosin vs. each of the following:   - No BPH medication - Doxazosin - Terazosin - Alfuzosin - Dutasteride - Finasteride | - Age ≥66 y - Diagnosed BPH | Median follow-up: 19.8 months | Incidence of dementia | - Connecticut Institute for Clinical and Translational Science - Patient-Centred Outcome Research Trust Fund |
| Welk et al. (2015) [51]  CA | Retro-spective cohort study | To determine whether there is an increased risk for falls and fractures upon treatment initiation with tamsulosin, alfuzosin or silodosin | Tamsulosin, silodosin, alfuzosin  vs.  no alpha-blocker treatment | - Age ≥66 y   Alpha-1 antagonist cohorts:   - Initiation of first treatment with tamsulosin, silodosin, or alfuzosin   Non-alpha-1 antagonist cohort:   - Unexposed to alpha-blocker - Matched on age, residential status, prior fractures, use of 5α-reductase inhibitors | - 90 days | *Primary outcome:*  hospitalization for a fall or fracture within 90 days after initiation of alpha-blocker therapy  *Secondary outcomes:*  hypotension, head trauma | Institute for Clinical Evaluative Sciences (Ontario Ministry of Health and Long-Term Care) |
| Hall and McMahon (2007) [52]  UK | Case-control study | To investigate the association of certain kind of fractures typical for falls and exposure to modified release (MR) doxazosin | Fracture vs. no fracture | - Age ≥50 y   Cases:   - Fracture of hip/femur, humerus, wrist - Mean age: 74 y   Controls:   - No fracture - Mean age: 73 y   Matched with Cases on primary care practice, year of birth and sex | Mean (SD) days of observation:   - Cases: 569 (344) - Controls: 569 (344) | Incidence of fracture of hip, femur, humerus and/or wrist | Pfizer UK |
| Testa et al. (2018) [53]  IT | Case-control study | To determine the role of antihypertensive drugs in inducing orthostatic hypotension related syncope in people with dementia | Syncopal fall vs. non-syncopal fall | - Age ≥65 y - Dementia - ≥1 transient loss of consciousness or unexplained fall within previous 3 months | 3 months | Orthostatic hypotension related syncopal falls | Endorsement of Italian Society of Gerontology and Geriatrics |

**Table c** Summary of characteristics of included meta-analyses

| Authors (year), place | Study type | Intention of the study | Intervention | Patients | Inclusion criteria | Follow-up period | Measured outcome | Sponsor |
| --- | --- | --- | --- | --- | --- | --- | --- | --- |
| Buzelin et al. (1997) [54]  FR, BE, DE, NL, DK | Meta-analysis based on 2 RCTs | To assess the safety profile of slow release (SR) alfuzosin in patients with symptomatic BPH | SR alfuzosin 2x5 mg/d  vs. placebo | SR alfzusosin:   - n=292 - ≥65 y: 149   Placebo:   - n=296 - ≥65 y: 153 | - LUTS due to BPH > 6 months - Nocturia: ≥2 and/or - Day-time frequency: ≥8 - Qmax: ≤15 ml/s - Voiding volume: >150 ml | 1 month | All ADEs with a special focus on ADEs related to vasodilatory events | N.a. |
| Lowe (1994) [56]  US, EU | Meta-analysis based on 6 double-blind RCTs | To assess the safety of terazosin in the treatment of symptomatic BPH | Terazosin  1-20 mg/d  vs. placebo | Terazosin:   - n=636 - ≥65 y: 285   Placebo:   - n=360 - ≥65 y: 162 | - Symptomatic BPH - Qmax: ≤12 ml/s - Min. voiding volume: 100-150 ml | 2-6 months | ADEs | Grant from Abbott Labora-tories |
| Chapple et al. (1997) [55]  BE, DE, DK, NL, NO, SE, UK | Meta-analysis based on 2 double-blind RCTs | To compare the safety and tolerability of tamsulosin vs. placebo in younger (<65 y) and older (≥65 y) patients with LUTS suggestive of BPH | Tamsulosin 0.4 mg/d vs. placebo | Tamsulosin:   - <65 y: 190 - ≥65 y: 191   Placebo:   - <65 y: 93 - ≥65 y: 100 | - Age ≥45 y - LUTS due to BPH - 4 ml/s ≤ Qmax ≤ 12 ml/s - Voiding volume: ≥120 ml - Boyarsky score >6 | 12 weeks | ADEs | Yama-nouchi Europe BV |
